# Supplementary material
Source: PubMed Central journal article supplement (PMC2754575)
Supplement: NIHMS125239-supplement-01.pdf [file NIHMS125239-supplement-01.pdf]

Supplementary figure 1.

(A). Full coding alignment of pinniped and selected species *KIR* cDNA sequences. Dots represent an identical residue to the first reference sequence. Domains are marked by vertical lines in the alignment and annotated above.

(B). Full coding alignment of pinniped and selected species *Ly49* cDNA sequences. Dots represent an identical residue to the first reference sequence. Domains are marked by vertical lines in the alignment and annotated above.

Supplementary figure 1A

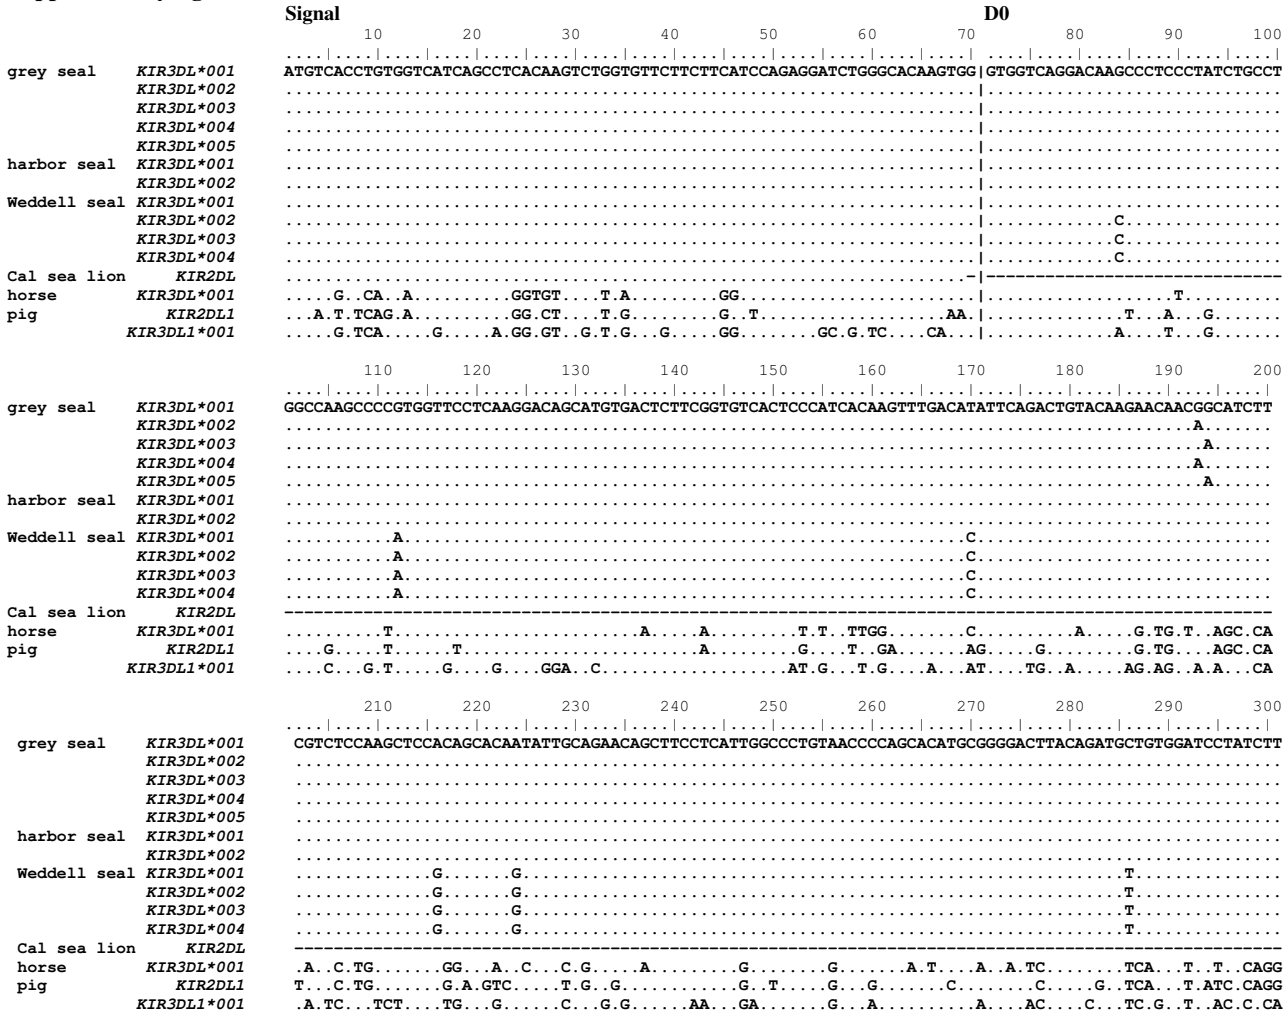



D2

```

610      620      630      640      650      660      670      680      690      700
grey seal KIR3DL*001 CGCTCCTCCCAATAAGTGGTCTGCCCCAGTGGGCCCTGGACATCATGATCACAG|GTCTACACCAGAACCTTCTCTCTGGGCCAGCCGGGCACCGTGG
KIR3DL*002
KIR3DL*003
KIR3DL*004
harbor seal KIR3DL*005
KIR3DL*001
Weddell seal KIR3DL*002
KIR3DL*001 G A
KIR3DL*002 G A
KIR3DL*003 G
KIR3DL*004 G G
Cal sea lion KIR2DL A G A T A
horse KIR3DL*001 TA T G GA A AC A A A C CT A TA T A C
pig KIR2DL1 T T CA GG C TG
KIR3DL1*001 A A C T C T A T AT G G C T TG CA C AA

710      720      730      740      750      760      770      780      790      800
grey seal KIR3DL*001 TGAGGTCAGGAGAGAACGTGACCTTGCTCTGCTCGGAGATTCTTTGATGTGTACCATCTATCCAGGGATGGCAGCCCATGAGCTCTGGCTCGC
KIR3DL*002
KIR3DL*003
KIR3DL*004 A
KIR3DL*005
harbor seal KIR3DL*001
KIR3DL*002
Weddell seal KIR3DL*001
KIR3DL*002
KIR3DL*003
KIR3DL*004
Cal sea lion KIR2DL G T
horse KIR3DL*001 T T T A T GC A T A G G AT T
pig KIR2DL1 A C G C CA GCT AA AA AA T GATGG A
KIR3DL1*001 TCA G G TA CCG GC A CA G GGAG A GTA C

810      820      830      840      850      860      870      880      890      900
grey seal KIR3DL*001 TAAGGGGCAGAGGCATGGCGGTGCATCCAGGCTGACTTCACTTGGGCCCTGCACACCCAGCCCTGGGTGGGACCTACAGATGCTATGGCTCTTCAAC
KIR3DL*002
KIR3DL*003
KIR3DL*004
KIR3DL*005
harbor seal KIR3DL*001
KIR3DL*002
Weddell seal KIR3DL*001 C
KIR3DL*002 C
KIR3DL*003
KIR3DL*004
Cal sea lion KIR2DL C T TG C C T
horse KIR3DL*001 GGA C AAT T CAT C TGAC T ACAAC T C T
pig KIR2DL1 GGA CA C CA TGG A TA T GGAC ATA C T G C T
KIR3DL1*001 GCA T GC A GTCAA A AA T A T C CAC ----- AC A TC CGT
```

**Stem**

|              |             | 910                                                    | 920                                          | 930       | 940       | 950    | 960    | 970      | 980         | 990     | 1000       |
|--------------|-------------|--------------------------------------------------------|----------------------------------------------|-----------|-----------|--------|--------|----------|-------------|---------|------------|
| grey seal    | KIR3DL*001  | CCCTCTCCCTGTGAGTGGTCAGGCCCGAGTGACCCACTGTACCTTTCTGTACAG | GAAACTCTTCAAATAGTTGCCTCCTATCCACAAAACCAACCCCA |           |           |        |        |          |             |         |            |
|              | KIR3DL*002  | .....                                                  | .....                                        | .....     | .....     | .....  | .....  | .....    | .....       | .....   | .....      |
|              | KIR3DL*003  | .....                                                  | .....                                        | .....     | .....     | .....  | .....  | .....    | .....       | .....   | .....      |
|              | KIR3DL*004  | .....                                                  | .....                                        | .....     | .....     | .....  | .....  | .....    | .....       | .....   | .....      |
| harbor seal  | KIR3DL*005  | .....                                                  | .....                                        | .....     | .....     | .....  | .....  | .....    | .....       | .....   | .....      |
| Weddell seal | KIR3DL*001  | .....                                                  | .....                                        | .....     | .....     | .....  | .....  | .....    | .....       | .....   | .....      |
|              | KIR3DL*002  | .....                                                  | .....                                        | .....     | .....     | .....  | .....  | .....    | .....       | .....   | .....      |
|              | KIR3DL*003  | .....                                                  | .....                                        | .....     | .....     | .....  | .....  | .....    | .....       | .....   | .....      |
|              | KIR3DL*004  | .....                                                  | .....                                        | .....     | .....     | .....  | .....  | .....    | .....       | .....   | .....      |
| Cal sea lion | KIR2DL      | .....                                                  | .....                                        | .....     | .....     | .....  | .....  | .....    | .....       | .....   | .....      |
| horse        | KIR3DL*001  | AA.....                                                | C.T.....                                     | A.A.....  | TG.....   | T..... | G..... | G.T..... | C.....      | TG..... | A.G.T..... |
| pig          | KIR2DL1     | A.....                                                 | ACAG.....                                    | A.GT..... | C.....    | T..... | A..... | G.....   | G.T.....    | C.....  | TG.....    |
|              | KIR3DL1*001 | A.....                                                 | AC.....                                      | A.....    | CTTG..... | .....  | C..... | G.....   | G.CTTC..... | C.....  | G.....     |

**Transmembrane**

|              |             | 1010   | 1020                                                                                     | 1030     | 1040          | 1050               | 1060       | 1070          | 1080      | 1090   | 1100         |
|--------------|-------------|--------|------------------------------------------------------------------------------------------|----------|---------------|--------------------|------------|---------------|-----------|--------|--------------|
| grey seal    | KIR3DL*001  | AAACTG | GTAACCCAGACACCTGCATGTTCTGGCTGGGCCCTTAGTGCCATCATCTCCCTCGTGTCTCTTTCTTCCTCACTCGTCAGTGGTGCCC |          |               |                    |            |               |           |        |              |
|              | KIR3DL*002  | .....  | .....                                                                                    | .....    | .....         | .....              | .....      | .....         | .....     | .....  | .....        |
|              | KIR3DL*003  | .....  | .....                                                                                    | .....    | .....         | .....              | .....      | .....         | .....     | .....  | .....        |
|              | KIR3DL*004  | .....  | .....                                                                                    | .....    | .....         | .....              | .....      | .....         | .....     | .....  | .....        |
|              | KIR3DL*005  | .....  | .....                                                                                    | .....    | .....         | .....              | .....      | .....         | .....     | .....  | .....        |
| harbor seal  | KIR3DL*001  | .....  | .....                                                                                    | .....    | .....         | .....              | .....      | .....         | .....     | .....  | .....        |
|              | KIR3DL*002  | .....  | .....                                                                                    | .....    | .....         | .....              | .....      | .....         | .....     | .....  | .....        |
| Weddell seal | KIR3DL*001  | .....  | .....                                                                                    | .....    | .....         | .....              | .....      | .....         | .....     | .....  | .....        |
|              | KIR3DL*002  | .....  | .....                                                                                    | .....    | .....         | .....              | .....      | .....         | .....     | .....  | .....        |
|              | KIR3DL*003  | .....  | .....                                                                                    | .....    | .....         | .....              | .....      | .....         | .....     | .....  | .....        |
|              | KIR3DL*004  | .....  | .....                                                                                    | .....    | .....         | .....              | .....      | .....         | .....     | .....  | .....        |
| Cal sea lion | KIR2DL      | .....  | .....                                                                                    | .....    | .....         | .....              | .....      | .....         | .....     | .....  | .....        |
| horse        | KIR3DL*001  | T..... | T.A.....                                                                                 | T.C..... | AT.....       | T.T.G.....         | T.A.C..... | A.....        | T.A.....  | C..... | .....        |
| pig          | KIR2DL1     | T..... | C.....                                                                                   | G.....   | T.T.CG.G..... | A.G.T.T.TCA.C..... | A.....     | TC.A.TGC..... | CA.A..... | .....  | .....        |
|              | KIR3DL1*001 | T..... | CA.....                                                                                  | AT.....  | A.C.....      | T.....             | C.T.....   | ATCC.C.....   | C.C.....  | T..... | CT.A.TC..... |

**Cytoplasmic Tail**

|              |             | 1110       | 1120                                                                                       | 1130     | 1140      | 1150        | 1160         | 1170      | 1180   | 1190         | 1200       |
|--------------|-------------|------------|--------------------------------------------------------------------------------------------|----------|-----------|-------------|--------------|-----------|--------|--------------|------------|
| grey seal    | KIR3DL*001  | TGCCAAGAGA | ATGCTGCTATAATGAACAGAGAGCCTGAGGTGGACAGAATGGTGAGCAGGGAGGACCCCTCAAGCAGAAGACCCACAGGAAGTGATATAC |          |           |             |              |           |        |              |            |
|              | KIR3DL*002  | .....      | .....                                                                                      | .....    | .....     | .....       | .....        | .....     | .....  | .....        | .....      |
|              | KIR3DL*003  | .....      | .....                                                                                      | .....    | .....     | .....       | .....        | .....     | .....  | .....        | .....      |
|              | KIR3DL*004  | .....      | .....                                                                                      | .....    | .....     | .....       | .....        | .....     | .....  | .....        | .....      |
|              | KIR3DL*005  | .....      | .....                                                                                      | .....    | .....     | .....       | .....        | .....     | .....  | .....        | .....      |
| harbor seal  | KIR3DL*001  | .....      | .....                                                                                      | .....    | .....     | .....       | .....        | .....     | .....  | .....        | .....      |
|              | KIR3DL*002  | .....      | .....                                                                                      | .....    | .....     | .....       | .....        | .....     | .....  | .....        | .....      |
| Weddell seal | KIR3DL*001  | .....      | .....                                                                                      | .....    | .....     | .....       | .....        | .....     | .....  | .....        | .....      |
|              | KIR3DL*002  | .....      | .....                                                                                      | .....    | .....     | .....       | .....        | .....     | .....  | .....        | .....      |
|              | KIR3DL*003  | .....      | .....                                                                                      | .....    | .....     | .....       | .....        | .....     | .....  | .....        | .....      |
|              | KIR3DL*004  | .....      | .....                                                                                      | .....    | .....     | .....       | .....        | .....     | .....  | .....        | .....      |
| Cal sea lion | KIR2DL      | .....      | .....                                                                                      | .....    | .....     | .....       | .....        | .....     | .....  | .....        | .....      |
| horse        | KIR3DL*001  | T.....     | A.....                                                                                     | G.....   | A.....    | AT.....     | G.G.A.....   | G.....    | C..... | .....        | .....      |
| pig          | KIR2DL1     | A.....     | G.....                                                                                     | C.A..... | G.....    | G.....      | C.....       | AT.C..... | G..... | GG.....      | G.CAG..... |
|              | KIR3DL1*001 | CAA.....   | A.A.....                                                                                   | G.....   | G.CA..... | CA.G.A..... | CA.CC.A..... | C.....    | T..... | G.T.A.C..... | TG.....    |

|              |             | 1210                                                                                               | 1220 | 1230 | 1240 | 1250 | 1260 | 1270 | 1280 | 1290 | 1300 |
|--------------|-------------|----------------------------------------------------------------------------------------------------|------|------|------|------|------|------|------|------|------|
| grey seal    | KIR3DL*001  | ACACAGTTGGATCATTCATTTTATGCAGAAAAAACCACCTCCCACTTCCCGGAGGCCCGAGGAACCCCTGCATGATGATGGTGTGTACATGGAATTCA |      |      |      |      |      |      |      |      |      |
|              | KIR3DL*002  | .....                                                                                              |      |      |      |      |      |      |      |      |      |
|              | KIR3DL*003  | .....                                                                                              |      |      |      |      |      |      |      |      |      |
|              | KIR3DL*004  | .....                                                                                              |      |      |      |      |      |      |      |      |      |
|              | KIR3DL*005  | .....                                                                                              |      |      |      |      |      |      |      |      |      |
| harbor seal  | KIR3DL*001  | .....                                                                                              |      |      |      |      |      |      |      |      |      |
|              | KIR3DL*002  | .....                                                                                              |      |      |      |      |      |      |      |      |      |
| Weddell seal | KIR3DL*001  | .....                                                                                              |      |      |      |      |      |      |      |      |      |
|              | KIR3DL*002  | .....                                                                                              |      |      |      |      |      |      |      |      |      |
|              | KIR3DL*003  | .....                                                                                              |      |      |      |      |      |      |      |      |      |
|              | KIR3DL*004  | .....                                                                                              |      |      |      |      |      |      |      |      |      |
| Cal sea lion | KIR2DL      | .....G.....T.....A.....CA.....C..G                                                                 |      |      |      |      |      |      |      |      |      |
| horse        | KIR3DL*001  | G.....                                                                                             |      |      |      |      |      |      |      |      |      |
| pig          | KIR2DL1     | ..G..G.....C..G.....C..CA.....T.....G.....A..C..A.....C..AC..ACCA..C.....TC..G                     |      |      |      |      |      |      |      |      |      |
|              | KIR3DL1*001 | G.....C..G.....C..CA.....G.....T.....G..C.....T..A.....A..AC.....CCTACA..ACCATCT.....C.....C..TC   |      |      |      |      |      |      |      |      |      |
|              |             | 1310                                                                                               | 1320 | 1330 |      |      |      |      |      |      |      |
| grey seal    | KIR3DL*001  | CAACATGC-----                                                                                      |      |      |      |      |      |      |      |      |      |
|              | KIR3DL*002  | -----                                                                                              |      |      |      |      |      |      |      |      |      |
|              | KIR3DL*003  | -----                                                                                              |      |      |      |      |      |      |      |      |      |
|              | KIR3DL*004  | -----                                                                                              |      |      |      |      |      |      |      |      |      |
|              | KIR3DL*005  | -----                                                                                              |      |      |      |      |      |      |      |      |      |
| harbor seal  | KIR3DL*001  | -----                                                                                              |      |      |      |      |      |      |      |      |      |
|              | KIR3DL*002  | -----                                                                                              |      |      |      |      |      |      |      |      |      |
| Weddell seal | KIR3DL*001  | -----                                                                                              |      |      |      |      |      |      |      |      |      |
|              | KIR3DL*002  | -----                                                                                              |      |      |      |      |      |      |      |      |      |
|              | KIR3DL*003  | -----                                                                                              |      |      |      |      |      |      |      |      |      |
|              | KIR3DL*004  | -----                                                                                              |      |      |      |      |      |      |      |      |      |
| Cal sea lion | KIR2DL      | -----                                                                                              |      |      |      |      |      |      |      |      |      |
| horse        | KIR3DL*001  | -----                                                                                              |      |      |      |      |      |      |      |      |      |
| pig          | KIR2DL1     | ...C...-----                                                                                       |      |      |      |      |      |      |      |      |      |
|              | KIR3DL1*001 | ...ATGCTAAGCCAGATCCAAGTTGTCTCCTGCCCCA                                                              |      |      |      |      |      |      |      |      |      |

Supplementary figure 1B

**Cytoplasmic Tail**

10 20 30 40 50 60 70 80 90 100

grey\_seal Ly49\*001 ATGAGCGATCAGCAAGTGATTTATTCCTCCCTGAGATTTCTTCAGTCTCCTTCAGAGTCACCAAATAGATTAAGGCCAGGTGGGACTCAAAGGCCTGGGA  
 Ly49\*002 .....T.....  
 harbor seal Ly49\*001 .....T.....  
 Ly49\*002 .....T.....  
 Weddell seal Ly49 .....A.....T.....  
 Cal sea lion Ly49 .....A.....T.....C.....  
 dog Ly49 .....A..G..A..A.....T.....A.....G..A.AC.....C.....  
 cat Ly49 .....A.....A.....AG..T.A.....A.....C.....  
 pig Ly49 .....AT...C...G.....C.....TAG.....C.....CA..A.....A..T.....T.....A.....C.....

**Transmembrane**

110 120 130 140 150 160 170 180 190 200

grey\_seal Ly49\*001 AAAATGATGGCAAAGGTTTTCAGTGACCTGGCAT|ACTCATAGCAGTGATTTGGGATCTTGTGTTTACTACTATTGGTGACAGTCGCACATATTGGGGAC  
 Ly49\*002 .....T.....  
 harbor seal Ly49\*001 .....T.....  
 Ly49\*002 .....T.....C.....C..G.....  
 Weddell seal Ly49 .....T.....G.....A.C.....C.....  
 Cal sea lion Ly49 .....G.....C..AA..A.....T.T.....C.....C..A.C.TT..T..CG.G.....  
 dog Ly49 .....C.....AG..A.....C.A.....T.....C.C.....C.....T..G.G.....  
 cat Ly49 .....G.C.....AA..A.....CT.....G..T.....C.C.....C..T..G.....A.....TAT.G.G.....  
 pig Ly49

**Stalk**

210 220 230 240 250 260 270 280 290 300

grey\_seal Ly49\*001 A|AAGATTTTTCAGTATATTTCAAGAAAACCATCAGCTGGGGAAATGATAGGAAACCTGACTCGAGAACACCACATTTTGCAAAATGACAGCTACTTAAAG  
 Ly49\*002 .....G.....  
 harbor seal Ly49\*001 .....G.....  
 Ly49\*002 .....G.....  
 Weddell seal Ly49 .....C.....G..T.....T.....G.....T.....  
 Cal sea lion Ly49 .....T.....C.....A..GT.....  
 dog Ly49 .....A.A.C..AT..A.....TT..G..A..GT...A..G.....C.....  
 cat Ly49 .....C.C.....G..A.....A.A.A.....TC..C.....C..A.A.A.GT...C..A.....G.A.....T.....  
 pig Ly49

310 320 330 340 350 360 370 380 390 400

grey\_seal Ly49\*001 GAGCGACTTTTGACAAATATGACTTTAGAATATAACATTCTCAAAAATGAATCGCTTCAGCAGAAAAAGGAACAGGATTTACTGTTTCAGATAGGAGAT  
 Ly49\*002 .....T.....  
 harbor seal Ly49\*001 .....T.....  
 Ly49\*002 .....T.....C.....  
 Weddell seal Ly49 .....A.....A.G.....AT.....C.....A..A.....CG.....  
 Cal sea lion Ly49 .....A.....A.T..G.....G.....GTG.....AGT.....T.A.G.....TA.AGAAAGGACAT..CCAGA  
 dog Ly49 .....A.....A..A.....G.....T.C..C..GAGAAAGGGATGTTGC.GAA..AT...G..T.T.CAAAGCC.T..C---  
 cat Ly49  
 pig Ly49

C-type lectin domain

```

          410      420      430      440      450      460      470      480      490      500
grey_seal Ly49*001 GTCAGAAAGAAAATGAA|GGCAAACCTCTATGAAAACCGCTGGTCTGTGTGGAAATAAAGTGTATTATTTTATTCCTGCAAGTAAAAACTGGAACGGATG
Ly49*002
harbor seal Ly49*001
Ly49*002
Weddell seal Ly49
Cal sea lion Ly49
dog Ly49
cat Ly49
pig Ly49

          510      520      530      540      550      560      570      580      590      600
grey_seal Ly49*001 TAAACAGACTTGCCAGAGTTATAATTCACTCTCTTTTGAAGATAAATGATGAAGATGAACTGGCCTTTATTCAACCCCAAACCTTAGGAATAACTACTGG
Ly49*002
harbor seal Ly49*001
Ly49*002
Weddell seal Ly49
Cal sea lion Ly49
dog Ly49
cat Ly49
pig Ly49

          610      620      630      640      650      660      670      680      690      700
grey_seal Ly49*001 ATTGGATTATCATATGATGATAGAGAACAATAATGGAAATGGATTGACACTGGTCCACCTTTTGGGATTAACATATGCATTCATGCGTTCTTCTGGAAGAG
Ly49*002
harbor seal Ly49*001
Ly49*002
Weddell seal Ly49
Cal sea lion Ly49
dog Ly49
cat Ly49
pig Ly49

          710      720      730      740      750      760      770      780      790      800
grey_seal Ly49*001 GA---CAATGTGCATTTTAAACCCCAACAAGAAATAGCAACTATTGAGTGCCTTAAGACCTACAATTGTATCTGTGAGGAGAGAATTGATGATGTTTTCTC
Ly49*002
harbor seal Ly49*001
Ly49*002
Weddell seal Ly49
Cal sea lion Ly49
dog Ly49
cat Ly49
pig Ly49

```



|              |          |                                                                                                  |     |     |     |     |     |     |     |     |     |  |
|--------------|----------|--------------------------------------------------------------------------------------------------|-----|-----|-----|-----|-----|-----|-----|-----|-----|--|
|              |          | 810                                                                                              | 820 | 830 | 840 | 850 | 860 | 870 | 880 | 890 | 900 |  |
| grey_seal    | Ly49*001 | TGCCTGCTTCAATATATACAAAGAAAAGAGAGCAC---AAGAGAGCACAAGCAGGGGGAGCGGCAGAAGCAGGCTCCCCGCGAGCAGAGAGACCGA |     |     |     |     |     |     |     |     |     |  |
|              | Ly49*002 | .....G.....AGAGTGC.....T..T.....                                                                 |     |     |     |     |     |     |     |     |     |  |
| harbor seal  | Ly49*001 | .....G.....AGAGTGC.....T..T.....                                                                 |     |     |     |     |     |     |     |     |     |  |
|              | Ly49*002 | .....G.....AGAGTGC.....T..T.....                                                                 |     |     |     |     |     |     |     |     |     |  |
| Weddell seal | Ly49     | ..T.....G.....A.AGCAC.....A.....G.....A.T.G.....T...                                             |     |     |     |     |     |     |     |     |     |  |
| Cal sea lion | Ly49     | .....C.....C.A.G.....G.....                                                                      |     |     |     |     |     |     |     |     |     |  |
| dog          | Ly49     | .....C.....AT..T.....A.T.....                                                                    |     |     |     |     |     |     |     |     |     |  |
| cat          | Ly49     | C-----                                                                                           |     |     |     |     |     |     |     |     |     |  |
| pig          | Ly49     | -----                                                                                            |     |     |     |     |     |     |     |     |     |  |

|              |          |                                                                             |     |     |     |     |     |  |
|--------------|----------|-----------------------------------------------------------------------------|-----|-----|-----|-----|-----|--|
|              |          | 910                                                                         | 920 | 930 | 940 | 950 | 960 |  |
| grey_seal    | Ly49*001 | CACAGGGCTTGATCCCAGGACCCCAGGACCCCAGGACCCCAGGACCCCAGGACCCCAGGACCCCAGGATCCTACC |     |     |     |     |     |  |
|              | Ly49*002 | .....                                                                       |     |     |     |     |     |  |
| harbor seal  | Ly49*001 | .....                                                                       |     |     |     |     |     |  |
|              | Ly49*002 | .....                                                                       |     |     |     |     |     |  |
| Weddell seal | Ly49     | .....                                                                       |     |     |     |     |     |  |
| Cal sea lion | Ly49     | .G.....                                                                     |     |     |     |     |     |  |
| dog          | Ly49     | -----                                                                       |     |     |     |     |     |  |
| cat          | Ly49     | -----                                                                       |     |     |     |     |     |  |
| pig          | Ly49     | -----                                                                       |     |     |     |     |     |  |
